## Correction

# Correction: Mixed Fortunes: Ancient Expansion and Recent Decline in Population Size of a Subtropical Montane Primate, the Arunachal Macaque *Macaca munzala*

The PLOS ONE Staff

The image for Figure S1 is incomplete. Please view the correct Figure S1 below.

## Supporting Information

**Figure S1. Map of Arunachal Pradesh, northeastern India, with locations of the sampling sites.** The triangles correspond to sampling sites in West Siang, circles to those in Upper Subansiri and rectangles to Tawang sampling sites. Inset: Location of the study site at the edge of Tibetan Plateau. (TIF)

## Reference

1. Chakraborty D, Sinha A, Ramakrishnan U (2014) Mixed Fortunes: Ancient Expansion and Recent Decline in Population Size of a Subtropical Montane Primate, the Arunachal Macaque *Macaca munzala*. PLoS ONE 9(7): e97061. doi:10.1371/journal.pone.0097061

**Citation:** The PLOS ONE Staff (2014) Correction: Mixed Fortunes: Ancient Expansion and Recent Decline in Population Size of a Subtropical Montane Primate, the Arunachal Macaque *Macaca munzala*. PLoS ONE 9(12): e116243. doi:10.1371/journal.pone.0116243

**Published:** December 17, 2014

**Copyright:** © 2014 The PLOS ONE Staff. This is an open-access article distributed under the terms of the Creative Commons Attribution License, which permits unrestricted use, distribution, and reproduction in any medium, provided the original author and source are credited.
